# Supplementary material for: Subtype-Specific Survival of Young Women with Breast Cancer and Its Interaction with the Germline BRCA Status
Source: MDPI journal article supplement (doi:10.3390/cancers16040738), 2024-02-10
Supplement: s1 [file s1]

**Supplementary**

**Figure S1:** Study flow-chart

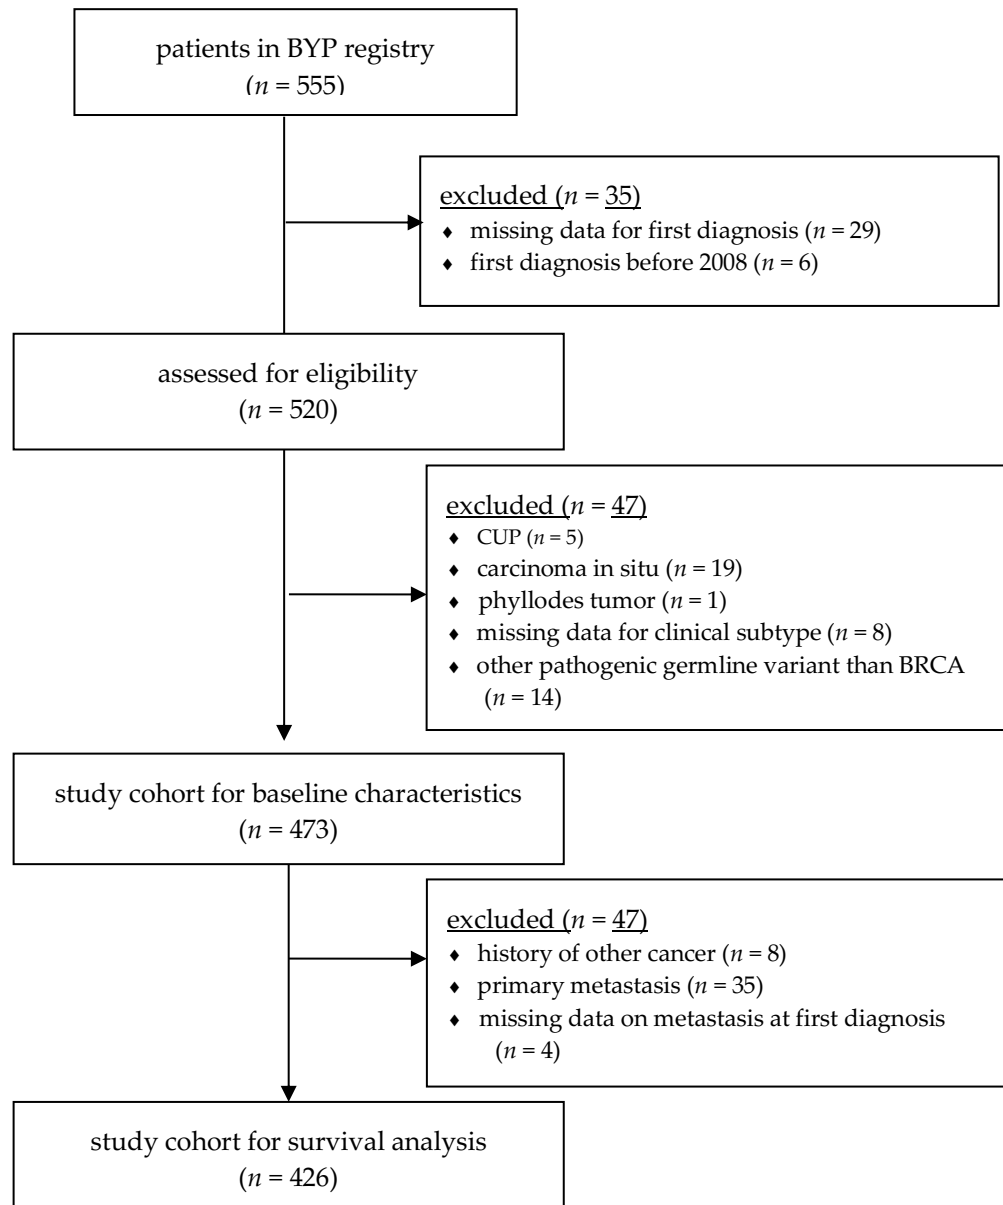

**Table S1:** Patient characteristics by gBRCA testing (study cohort for baseline characteristics).

|                    |                 | gBRCA testing – <i>n</i> (%) |         |                    |         |
|--------------------|-----------------|------------------------------|---------|--------------------|---------|
|                    |                 | tested                       |         | not tested/missing |         |
|                    |                 | <i>(n</i> = 319)             |         | <i>(n</i> = 154)   |         |
| age at initial     | ≤25             | 11                           | 3.4%    | 3                  | 1.9%    |
| diagnosis          | 26-30           | 52                           | 16.3%   | 18                 | 11.7%   |
|                    | 31-35           | 146                          | 45.8%   | 38                 | 24.7%   |
|                    | 36-39           | 110                          | 34.5%   | 95                 | 61.7%   |
| median age (range) |                 | 34                           | (22-39) | 36                 | (24-39) |
| clinical subtype   | triple negative | 125                          | 39.2%   | 23                 | 14.9%   |
|                    | HR+/Her2–       | 137                          | 42.9%   | 95                 | 61.7%   |
|                    | HR+/Her2+       | 39                           | 12.2%   | 26                 | 16.9%   |
|                    | Her2+/HR–       | 18                           | 5.6%    | 10                 | 6.5%    |
| year of first      | 2008            | 14                           |         | 22                 |         |
| diagnosis          | 2009            | 7                            |         | 12                 |         |
|                    | 2010            | 12                           |         | 25                 |         |
|                    | 2011            | 17                           |         | 18                 |         |
|                    | 2012            | 17                           |         | 15                 |         |
|                    | 2013            | 22                           |         | 13                 |         |
|                    | 2014            | 31                           |         | 8                  |         |
|                    | 2015            | 52                           |         | 7                  |         |
|                    | 2016            | 36                           |         | 9                  |         |
|                    | 2017            | 43                           |         | 7                  |         |
|                    | 2018            | 27                           |         | 6                  |         |
|                    | 2019            | 41                           |         | 12                 |         |

**Figure S2:** Survival by clinical subtype with gBRCAm / gBRCAwt TNBC, (A) DDFS, (B) OS.

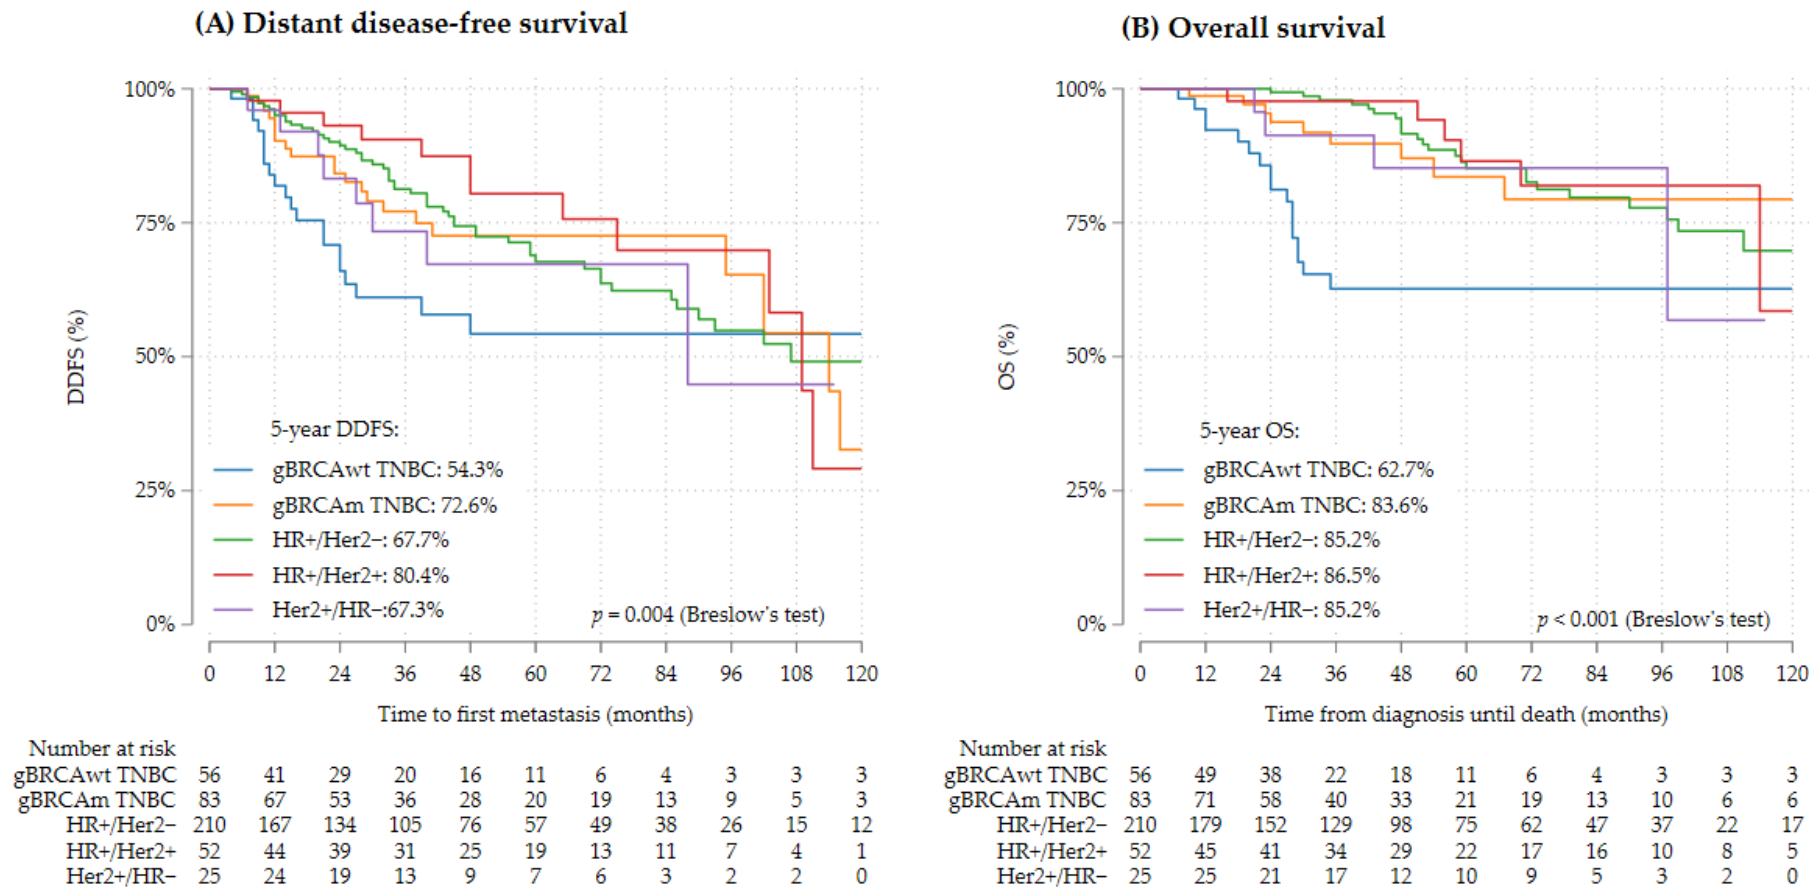

**Table S2:** Patient characteristics by BRCA status (study cohort for survival analysis).

|                          |                      | clinical subtype – n (%) |         |          |         |           |         |          |         |           |         |         |         |           |         |         |         |
|--------------------------|----------------------|--------------------------|---------|----------|---------|-----------|---------|----------|---------|-----------|---------|---------|---------|-----------|---------|---------|---------|
|                          |                      | triple-negative          |         |          |         | HR+/Her2– |         |          |         | HR+/Her2+ |         |         |         | Her2+/HR– |         |         |         |
|                          |                      | gBRCAwt                  |         | gBRCAm   |         | gBRCAwt   |         | gBRCAm   |         | gBRCAwt   |         | gBRCAm  |         | gBRCAwt   |         | gBRCAm  |         |
|                          |                      | (n = 56)                 |         | (n = 62) |         | (n = 87)  |         | (n = 44) |         | (n = 31)  |         | (n = 5) |         | (n = 14)  |         | (n = 2) |         |
| age at initial diagnosis | ≤25                  | 1                        | 1.8%    | 3        | 4.8%    | 2         | 2.3%    | 3        | 6.8%    | 1         | 4.0%    | 1       | 20.0%   | 0         | 0.0%    | 0       | 0.0%    |
|                          | 26-30                | 8                        | 14.3%   | 15       | 24.2%   | 11        | 12.6%   | 6        | 13.6%   | 2         | 0.0%    | 1       | 20.0%   | 4         | 28.6%   | 0       | 0.0%    |
|                          | 31-35                | 26                       | 46.4%   | 33       | 53.2%   | 36        | 41.4%   | 22       | 50.0%   | 11        | 40.0%   | 1       | 20.0%   | 6         | 42.9%   | 1       | 50.0%   |
|                          | 36-39                | 21                       | 37.5%   | 11       | 17.7%   | 38        | 43.7%   | 13       | 29.5%   | 17        | 56.0%   | 2       | 40.0%   | 4         | 28.6%   | 1       | 50.0%   |
| median age (range)       |                      | 34                       | (25-39) | 32       | (22-39) | 35        | (22-39) | 34       | (23-39) | 36        | (25-39) | 34      | (25-37) | 32        | (26-39) | 37      | (35-38) |
| gBRCA status             | gBRCA1m              | -                        |         | 55       | 88.7%   | -         |         | 22       | 50.0%   | -         |         | 2       | 40.0%   | -         |         | 2       | 100.0%  |
|                          | gBRCA2m              | -                        |         | 6        | 9.7%    | -         |         | 22       | 50.0%   | -         |         | 3       | 60.0%   | -         |         | 0       | 0.0%    |
|                          | both                 | -                        |         | 1        | 1.6%    | -         |         | 0        | 0.0%    | -         |         | 0       | 0.0%    | -         |         | 0       | 0.0%    |
| histopathology           | NST/ invasive ductal | 46                       | 83.6%   | 55       | 94.8%   | 70        | 84.3%   | 41       | 95.3%   | 30        | 96.8%   | 5       | 100.0%  | 13        | 100.0%  | 2       | 100.0%  |
|                          | invasive lobular     | 1                        | 1.8%    | 0        | 0.0%    | 7         | 8.4%    | 1        | 2.3%    | 1         | 3.2%    | 0       | 0.0%    | 0         | 0.0%    | 0       | 0.0%    |
|                          | medullary            | 5                        | 9.1%    | 2        | 3.4%    | 1         | 1.5%    | 1        | 2.3%    | 0         | 0.0%    | 0       | 0.0%    | 0         | 0.0%    | 0       | 0.0%    |
|                          | mucinous             | 0                        | 0.0%    | 0        | 0.0%    | 3         | 2.9%    | 0        | 0.0%    | 0         | 0.0%    | 0       | 0.0%    | 0         | 0.0%    | 0       | 0.0%    |
|                          | metaplastic          | 3                        | 5.5%    | 1        | 1.7%    | 0         | 0.0%    | 0        | 0.0%    | 0         | 0.0%    | 0       | 0.0%    | 0         | 0.0%    | 0       | 0.0%    |
|                          | other                | 0                        | 0.0%    | 0        | 0.0%    | 2         | 2.9%    | 0        | 0.0%    | 0         | 0.0%    | 0       | 0.0%    | 0         | 0.0%    | 0       | 0.0%    |
|                          | missing              | 1                        |         | 4        |         | 4         |         | 1        |         | 0         |         | 0       |         | 1         |         | 0       |         |
| T stage                  | T1                   | 16                       | 30.8%   | 24       | 40.7%   | 37        | 43.0%   | 25       | 58.1%   | 15        | 48.4%   | 4       | 80.0%   | 3         | 23.1%   | 1       | 50.0%   |
|                          | T2                   | 30                       | 57.7%   | 30       | 50.8%   | 36        | 41.9%   | 16       | 37.2%   | 15        | 48.4%   | 1       | 20.0%   | 5         | 38.5%   | 1       | 50.0%   |
|                          | T3                   | 4                        | 7.7%    | 3        | 5.1%    | 12        | 14.0%   | 1        | 2.3%    | 1         | 3.2%    | 0       | 0.0%    | 3         | 23.1%   | 0       | 0.0%    |
|                          | T4                   | 2                        | 3.8%    | 2        | 3.4%    | 1         | 1.2%    | 1        | 2.3%    | 0         | 0.0%    | 0       | 0.0%    | 2         | 15.4%   | 0       | 0.0%    |
|                          | missing              | 4                        |         | 3        |         | 1         |         | 1        |         | 0         |         | 0       |         | 1         |         | 0       |         |
| nodal involvement        | N0                   | 26                       | 50.0%   | 34       | 58.6%   | 38        | 43.7%   | 28       | 68.3%   | 23        | 74.2%   | 3       | 60.0%   | 3         | 23.1%   | 1       | 50.0%   |
|                          | N+                   | 26                       | 50.0%   | 24       | 41.4%   | 49        | 56.3%   | 13       | 31.7%   | 8         | 25.8%   | 2       | 40.0%   | 10        | 76.9%   | 1       | 50.0%   |
|                          | missing              | 4                        |         | 4        |         | 0         |         | 3        |         | 0         |         | 0       |         | 1         |         | 0       |         |
| tumor grading            | G1                   | 0                        | 0.0%    | 0        | 0.0%    | 8         | 9.2%    | 3        | 6.8%    | 3         | 10.3%   | 0       | 0.0%    | 0         | 0.0%    | 0       | 0.0%    |
|                          | G2                   | 5                        | 9.3%    | 11       | 19.6%   | 48        | 55.2%   | 23       | 52.3%   | 15        | 51.7%   | 3       | 60.0%   | 6         | 46.2%   | 2       | 100.0%  |
|                          | G3                   | 49                       | 90.7%   | 45       | 80.4%   | 31        | 35.6%   | 18       | 40.9%   | 11        | 37.9%   | 2       | 40.0%   | 7         | 53.8%   | 0       | 0.0%    |
|                          | missing              | 2                        |         | 6        |         | 0         |         | 0        |         | 2         |         | 0       |         | 1         |         | 0       |         |

|                                  |                     |    |        |    |       |    |        |    |       |    |       |   |        |    |        |   |        |
|----------------------------------|---------------------|----|--------|----|-------|----|--------|----|-------|----|-------|---|--------|----|--------|---|--------|
| Ki67 proliferative index         | low ( $\leq 15\%$ ) | 1  | 2.0%   | 0  | 0.0%  | 30 | 36.6%  | 12 | 28.6% | 9  | 29.0% | 0 | 0.0%   | 3  | 23.1%  | 0 | 0.0%   |
|                                  | intermediate        | 8  | 15.7%  | 14 | 25.9% | 35 | 42.7%  | 11 | 26.2% | 12 | 38.7% | 3 | 60.0%  | 4  | 30.8%  | 1 | 50.0%  |
|                                  | high ( $>35\%$ )    | 42 | 82.4%  | 40 | 74.1% | 17 | 20.7%  | 19 | 45.2% | 10 | 32.3% | 2 | 40.0%  | 6  | 46.2%  | 1 | 50.0%  |
|                                  | missing             | 5  |        | 8  |       | 5  |        | 2  |       | 0  |       | 0 |        | 1  |        | 0 |        |
| chemotherapy                     | no                  | 0  | 0.0%   | 3  | 4.8%  | 18 | 20.9%  | 13 | 29.5% | 2  | 6.5%  | 0 | 0.0%   | 0  | 0.0%   | 0 | 0.0%   |
| treatment of first occurrence    | yes                 | 56 | 100.0% | 59 | 95.2% | 68 | 79.1%  | 31 | 70.5% | 29 | 93.5% | 5 | 100.0% | 14 | 100.0% | 2 | 100.0% |
|                                  | missing             | 0  |        | 0  |       | 1  |        | 0  |       | 0  |       | 0 |        | 0  |        | 0 |        |
| use of platinum compounds in     | no (other chemo)    | 37 | 67.3%  | 26 | 46.4% | 66 | 100.0% | 25 | 86.2% | 25 | 86.2% | 5 | 100.0% | 7  | 50.0%  | 2 | 100.0% |
| chemotherapy of first occurrence | yes                 | 18 | 32.7%  | 30 | 53.6% | 0  | 0.0%   | 4  | 13.8% | 4  | 13.8% | 0 | 0.0%   | 7  | 50.0%  | 0 | 0.0%   |
|                                  | n/a - no chemo      | 0  |        | 3  |       | 18 |        | 13 |       | 2  |       | 0 |        | 0  |        | 0 |        |
|                                  | missing             | 1  |        | 3  |       | 3  |        | 2  |       | 0  |       | 0 |        | 0  |        | 0 |        |

\*Percentages may not total 100 because of rounding

**Table S3:** Additional multivariate Cox proportional hazard model for DDFS and OS in TNBC

| factor               | levels  | DDFS               |                 | OS                 |                 |
|----------------------|---------|--------------------|-----------------|--------------------|-----------------|
|                      |         | HR (95% CI)        | <i>p</i> -value | HR (95% CI)        | <i>p</i> -value |
| germline BRCA status | gBRCAm  | 1.00               |                 | 1.00               |                 |
|                      | gBRCAwt | 1.81 (0.85, 3.86)  | 0.125           | 6.47 (1.84, 22.73) | 0.004           |
| T stage              | T1      | 1.00               |                 | 1.00               |                 |
|                      | T2      | 6.60 (1.54, 28.16) | 0.011           | 4.69 (1.05, 21.02) | 0.043           |
|                      | T3/T4   | 8.72 (1.67, 45.50) | 0.010           | 4.17 (0.57, 30.25) | 0.158           |

**Table S4:** Additional univariate Cox proportional hazard models for DDFS and OS in TNBC

| factor                                  | levels                | DDFS               |                 | OS                    |                 |
|-----------------------------------------|-----------------------|--------------------|-----------------|-----------------------|-----------------|
|                                         |                       | HR (95% CI)        | <i>p</i> -value | HR (95% CI)           | <i>p</i> -value |
| interaction of gBRCAm and chemotherapy  | gBRCAm + other chemo  | 1.00               |                 | 1.00                  |                 |
|                                         | gBRCAm + platinum     | 2.18 (0.53, 8.98)  | 0.280           | 0.024 (0.00, 4126.22) | 0.544           |
| interaction of gBRCAwt and chemotherapy | gBRCAwt + other chemo | 1.00               |                 | 1.00                  |                 |
|                                         | gBRCAwt + platinum    | 4.34 (1.77, 10.66) | 0.001           | 2.48 (0.95, 6.45)     | 0.062           |

**Figure S3:** Survival of TNBC by gBRCA1m, gBRCA2m and gBRCAwt, (A) DDFS, (B) OS.\*

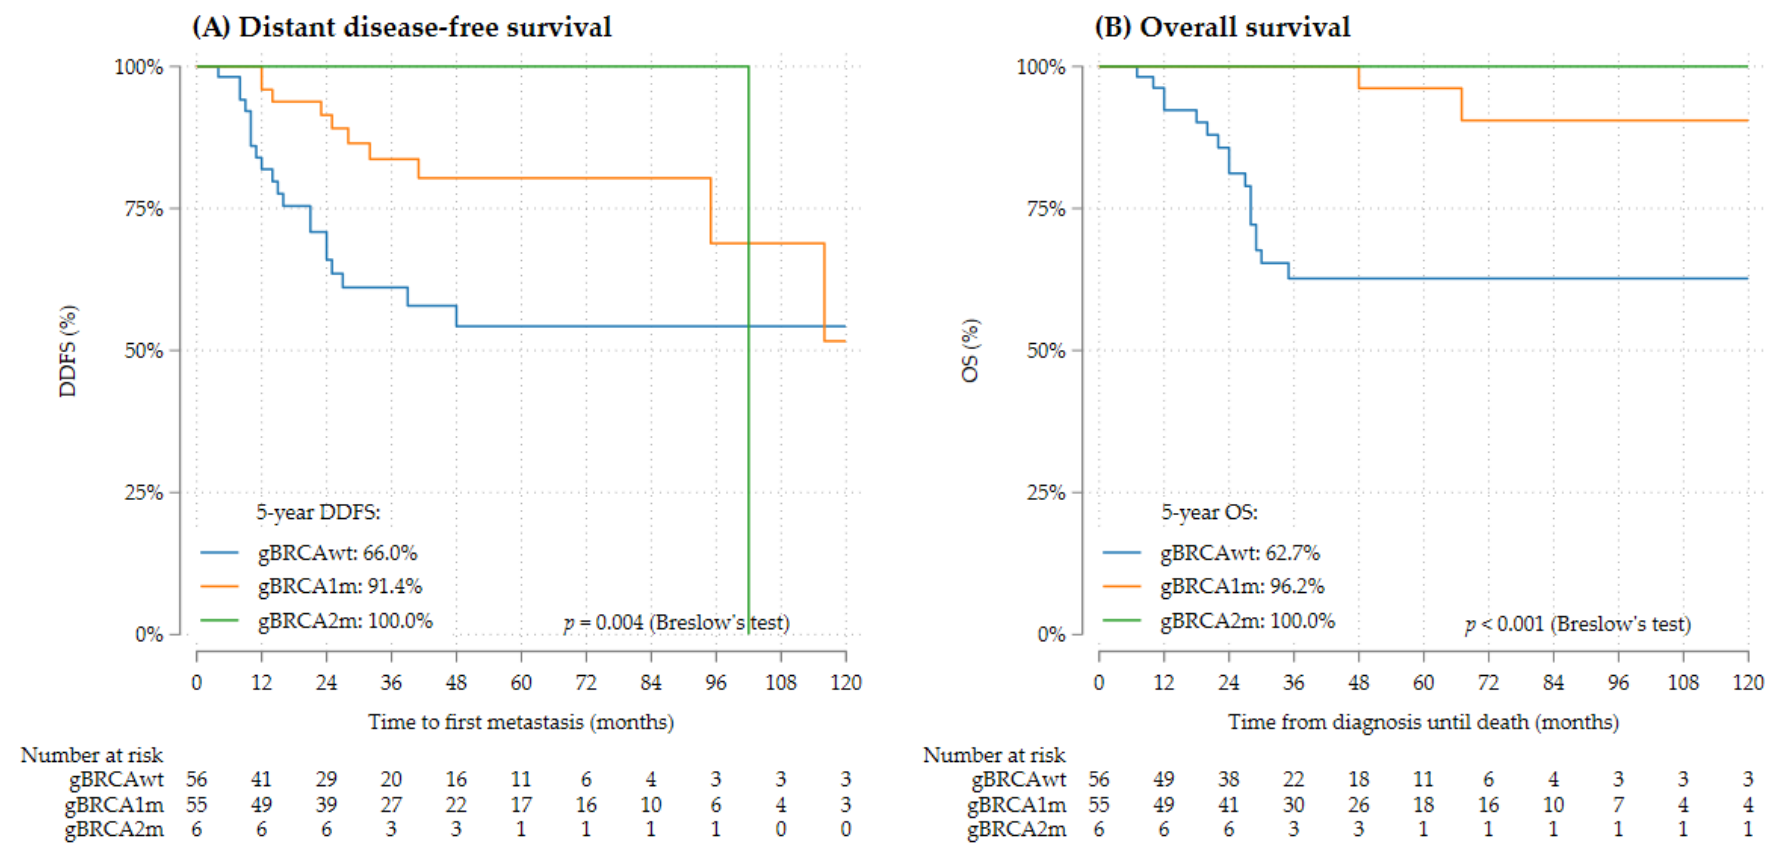

\*the patient with both gBRCA1m and gBRCA2m was excluded from this overview

**Figure S4:** Survival of HR+/Her2- BC by gBRCA1m, gBRCA2m and gBRCAwt, (A) DDFS, (B) OS.

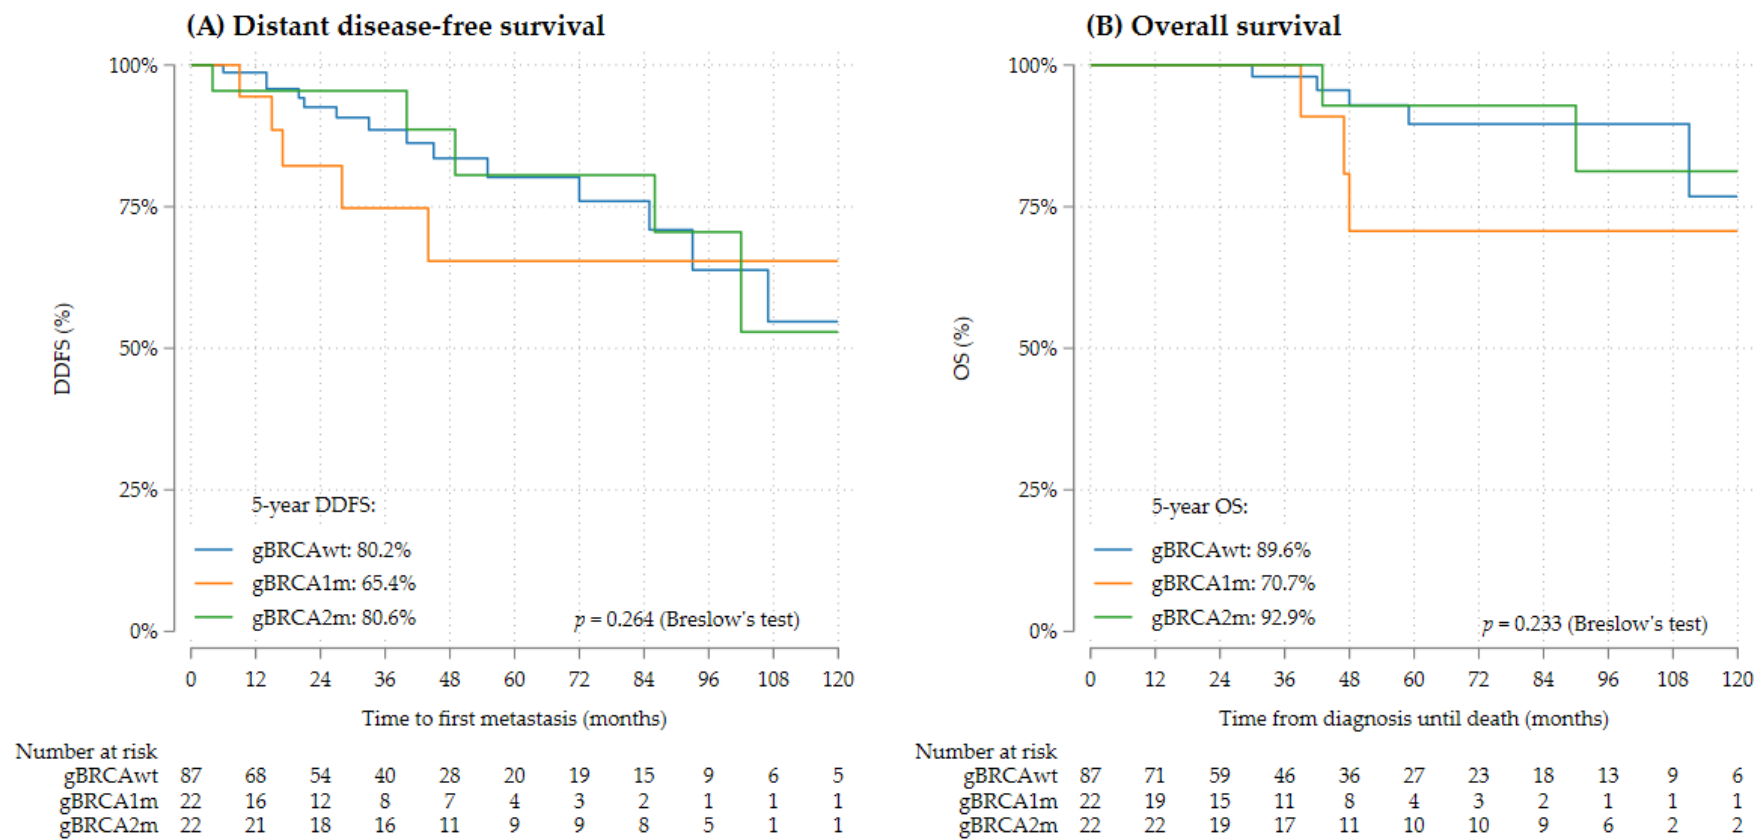

**Table S5:** Patient characteristics by gBRCA1m, gBRCA2m and gBRCAwt (study cohort for survival analysis).\*

|                    |                      | clinical subtype – n (%) |         |          |         |         |         |           |         |          |         |          |         |
|--------------------|----------------------|--------------------------|---------|----------|---------|---------|---------|-----------|---------|----------|---------|----------|---------|
|                    |                      | triple-negative          |         |          |         |         |         | HR+/Her2– |         |          |         |          |         |
|                    |                      | gBRCAwt                  |         | gBRCA1m  |         | gBRCA2m |         | gBRCAwt   |         | gBRCA1m  |         | gBRCA2m  |         |
|                    |                      | (n = 56)                 |         | (n = 55) |         | (n = 6) |         | (n = 87)  |         | (n = 22) |         | (n = 22) |         |
| age at initial     | ≤25                  | 1                        | 1.8%    | 3        | 5.5%    | 0       | 0.0%    | 2         | 2.3%    | 2        | 9.1%    | 1        | 4.5%    |
| diagnosis          | 26-30                | 8                        | 14.3%   | 13       | 23.6%   | 2       | 33.3%   | 11        | 12.6%   | 4        | 18.2%   | 2        | 9.1%    |
|                    | 31-35                | 26                       | 46.4%   | 30       | 54.5%   | 2       | 33.3%   | 36        | 41.4%   | 12       | 54.5%   | 10       | 45.5%   |
|                    | 36-39                | 21                       | 37.5%   | 9        | 16.4%   | 2       | 33.3%   | 38        | 43.7%   | 4        | 18.2%   | 9        | 40.9%   |
|                    |                      |                          |         |          |         |         |         |           |         |          |         |          |         |
| median age (range) |                      | 34                       | (25-39) | 32       | (22-39) | 34      | (29-39) | 35        | (22-39) | 34       | (24-39) | 35       | (23-39) |
| histopathology     | NST/ invasive ductal | 46                       | 83.6%   | 48       | 94.1%   | 6       | 100.0%  | 70        | 84.3%   | 21       | 95.5%   | 20       | 95.2%   |
|                    | invasive lobular     | 1                        | 1.8%    | 0        | 0.0%    | 0       | 0.0%    | 7         | 8.4%    | 0        | 0.0%    | 1        | 4.8%    |
|                    | medullary            | 5                        | 9.1%    | 2        | 3.9%    | 0       | 0.0%    | 1         | 1.5%    | 1        | 4.8%    | 0        | 0.0%    |
|                    | mucinous             | 0                        | 0.0%    | 0        | 0.0%    | 0       | 0.0%    | 3         | 2.9%    | 0        | 0.0%    | 0        | 0.0%    |
|                    | metaplastic          | 3                        | 5.5%    | 1        | 2.0%    | 0       | 0.0%    | 0         | 0.0%    | 0        | 0.0%    | 0        | 0.0%    |
|                    | other                | 0                        | 0.0%    | 0        | 0.0%    | 0       | 0.0%    | 2         | 2.9%    | 0        | 0.0%    | 0        | 0.0%    |
|                    | missing              | 1                        |         | 4        |         | 0       |         | 4         |         | 0        |         | 1        |         |
| T stage            | T1                   | 16                       | 30.8%   | 23       | 43.4%   | 1       | 20.0%   | 37        | 43.0%   | 13       | 59.1%   | 12       | 57.1%   |
|                    | T2                   | 30                       | 57.7%   | 26       | 49.1%   | 4       | 80.0%   | 36        | 41.9%   | 8        | 36.4%   | 8        | 38.1%   |
|                    | T3                   | 4                        | 7.7%    | 3        | 5.7%    | 0       | 0.0%    | 12        | 14.0%   | 0        | 0.0%    | 1        | 4.8%    |
|                    | T4                   | 2                        | 3.8%    | 1        | 1.9%    | 0       | 0.0%    | 1         | 1.2%    | 1        | 4.5%    | 0        | 0.0%    |
|                    | missing              | 4                        |         | 2        |         | 1       |         | 1         |         | 0        |         | 1        |         |
| nodal              | N0                   | 26                       | 50.0%   | 32       | 61.5%   | 2       | 40.0%   | 38        | 43.7%   | 15       | 75.0%   | 13       | 61.9%   |
| involvement        | N+                   | 26                       | 50.0%   | 20       | 38.5%   | 3       | 60.0%   | 49        | 56.3%   | 5        | 25.0%   | 8        | 38.1%   |
|                    | missing              | 4                        |         | 3        |         | 1       |         | 0         |         | 2        |         | 1        |         |



|                                                               |                     |    |        |    |       |   |        |    |        |    |       |    |       |
|---------------------------------------------------------------|---------------------|----|--------|----|-------|---|--------|----|--------|----|-------|----|-------|
| tumor grading                                                 | G1                  | 0  | 0.0%   | 0  | 0.0%  | 0 | 0.0%   | 8  | 9.2%   | 3  | 13.6% | 0  | 0.0%  |
|                                                               | G2                  | 5  | 9.3%   | 9  | 18.4% | 1 | 16.7%  | 48 | 55.2%  | 5  | 22.7% | 18 | 81.8% |
|                                                               | G3                  | 49 | 90.7%  | 40 | 81.6% | 5 | 83.3%  | 31 | 35.6%  | 14 | 63.6% | 4  | 18.2% |
|                                                               | missing             | 2  |        | 6  |       | 0 |        | 0  |        | 0  |       | 0  |       |
| Ki67 proliferative index                                      | low ( $\leq 15\%$ ) | 1  | 2.0%   | 0  | 0.0%  | 0 | 0.0%   | 30 | 36.6%  | 4  | 20.0% | 8  | 36.4% |
|                                                               | intermediate        | 8  | 15.7%  | 12 | 25.5% | 2 | 33.3%  | 35 | 42.7%  | 3  | 15.0% | 8  | 36.4% |
|                                                               | high ( $>35\%$ )    | 42 | 82.4%  | 35 | 74.5% | 4 | 66.7%  | 17 | 20.7%  | 13 | 65.0% | 6  | 27.3% |
|                                                               | missing             | 5  |        | 8  |       | 0 |        | 5  |        | 2  |       | 0  |       |
| chemotherapy                                                  | no                  | 0  | 0.0%   | 3  | 5.5%  | 0 | 0.0%   | 18 | 20.9%  | 3  | 13.6% | 10 | 45.5% |
| treatment of first occurrence                                 | yes                 | 56 | 100.0% | 52 | 94.5% | 6 | 100.0% | 68 | 79.1%  | 19 | 86.4% | 12 | 54.5% |
|                                                               | missing             | 0  |        | 0  |       | 0 |        | 1  |        | 0  |       | 0  |       |
| use of platinum compounds in chemotherapy of first occurrence | no (other chemo)    | 37 | 67.3%  | 24 | 49.0% | 2 | 33.3%  | 66 | 100.0% | 14 | 82.4% | 11 | 91.7% |
|                                                               | yes                 | 18 | 32.7%  | 25 | 51.0% | 4 | 66.7%  | 0  | 0.0%   | 3  | 17.6% | 1  | 8.3%  |
|                                                               | n/a - no chemo      | 0  |        | 3  |       | 0 | 0.0%   | 18 |        | 3  |       | 10 |       |
|                                                               | missing             | 1  |        | 3  |       | 0 |        | 3  |        | 2  |       | 0  |       |

\*Percentages may not total 100 because of rounding; the patient with both gBRCA1m and gBRCA2m was excluded from this overview.
